# Supplementary material for: Flavan-3-ol monomers intake is associated with osteoarthritis risk in Americans over 40 years of age: results from the National Health and Nutritional Examination Survey database
Source: Royal Society of Chemistry journal article supplement (doi:10.1039/d3fo04687g), 2024-01-01
Supplement: d3fo04687g1.pdf [file d3fo04687g1.pdf]

**TABLE S1** Subgroup analyses of the association between flavan-3-ols and OA were stratified by sex, age, race, BMI.

| <b>Character</b>   | <b>OR(95%CI)</b>           | <b>P for interaction</b> |
|--------------------|----------------------------|--------------------------|
| <b>Sex</b>         |                            | 0.265                    |
| Female             | 1.000(1.000,1.001)         |                          |
| Male               | 1.000(0.999, 1.000)        |                          |
| <b>Age</b>         |                            | 0.494                    |
| Q1                 | 1.000(1.000, 1.001)        |                          |
| Q2                 | 1.000(0.999, 1.001)        |                          |
| Q3                 | 1.000(1.000, 1.001)        |                          |
| Q4                 | 1.000(0.999,1.001)         |                          |
| <b>Race</b>        |                            | 0.646                    |
| Non-Hispanic white | 1.000(1.000, 1.001)        |                          |
| Non-Hispanic black | 1.000(0.999, 1.002)        |                          |
| Mexican American   | <b>1.001(1.000, 1.001)</b> |                          |
| Other Hispanic     | 0.998(0.996, 1.001)        |                          |
| Other race         | 1.000(1.000, 1.001)        |                          |
| <b>BMI</b>         |                            | 0.126                    |
| Not overweight     | 1.000(0.999,1.001)         |                          |
| Overweight         | 0.999(0.999, 1.000)        |                          |
| Obesity            | 1.000(1.000,1.001)         |                          |

The bold values refer to  $p < 0.05$ . Adjusted for sex, age, race, education level, PIR, BMI, physical activities, smoking, alcohol drinking, diabetes, hypertension, NSAIDs use, glucocorticoids use, tramadol use, vitamin D intake, vitamin K intake, dietary fiber intake. BMI: body mass index. CI: confidence intervals. NSAIDs: non-steroidal anti-inflammatory drugs. OA: osteoarthritis. OR: odds ratio. PIR: poverty income ratio. Q1: 40-50. Q2: 50-60. Q3: 60-70. Q4: 70-80.

**TABLE S2** Subgroup analyses of the association between EGC and OA were stratified by sex, age, race, BMI.

| <b>Character</b>   | <b>OR(95%CI)</b>           | <b>P for interaction</b> |
|--------------------|----------------------------|--------------------------|
| <b>Sex</b>         |                            | 0.221                    |
| Female             | <b>1.003(1.000,1.006)</b>  |                          |
| Male               | 1.001(0.997, 1.005)        |                          |
| <b>Age</b>         |                            | 0.200                    |
| Q1                 | <b>1.004(1.001, 1.006)</b> |                          |
| Q2                 | 1.000(0.995, 1.005)        |                          |
| Q3                 | <b>1.003(1.000, 1.006)</b> |                          |
| Q4                 | 0.997(0.991,1.003)         |                          |
| <b>Race</b>        |                            | 0.266                    |
| Non-Hispanic white | <b>1.003(1.000, 1.006)</b> |                          |
| Non-Hispanic black | 1.002(0.991,1.015)         |                          |
| Mexican American   | <b>1.008(1.001, 1.015)</b> |                          |
| Other Hispanic     | 0.987(0.966, 1.008)        |                          |
| Other race         | 1.002(0.998, 1.006)        |                          |
| <b>BMI</b>         |                            | 0.109                    |
| Not overweight     | 1.002(0.999,1.006)         |                          |
| Overweight         | 0.995(0.988, 1.002)        |                          |
| Obesity            | <b>1.003(1.001,1.006)</b>  |                          |

The bold values refer to  $p < 0.05$ . Adjusted for sex, age, race, education level, PIR, BMI, physical activities, smoking, alcohol drinking, diabetes, hypertension, NSAIDs use, glucocorticoids use, tramadol use, vitamin D intake, vitamin K intake, dietary fiber intake. BMI: body mass index. CI: confidence intervals. EGC: epigallocatechin. NSAIDs: non-steroidal anti-inflammatory drugs. OA: osteoarthritis. OR: odds ratio. PIR: poverty income ratio. Q1: 40-50. Q2: 50-60. Q3: 60-70. Q4: 70-80.

**TABLE S3** Subgroup analyses of the association between EGCG and OA were stratified by sex, age, race, BMI.

| <b>Character</b>   | <b>OR(95%CI)</b>           | <b>P for interaction</b> |
|--------------------|----------------------------|--------------------------|
| <b>Sex</b>         |                            | 0.288                    |
| Female             | <b>1.002(1.000,1.003)</b>  |                          |
| Male               | 1.000(0.998, 1.003)        |                          |
| <b>Age</b>         |                            | 0.117                    |
| Q1                 | <b>1.002(1.001, 1.003)</b> |                          |
| Q2                 | 1.000(0.998, 1.002)        |                          |
| Q3                 | <b>1.002(1.000, 1.003)</b> |                          |
| Q4                 | 0.998(0.995,1.002)         |                          |
| <b>Race</b>        |                            | 0.086                    |
| Non-Hispanic white | <b>1.002(1.001, 1.003)</b> |                          |
| Non-Hispanic black | 1.002(0.997,1.008)         |                          |
| Mexican American   | <b>1.004(1.001, 1.008)</b> |                          |
| Other Hispanic     | 0.992(0.979, 1.005)        |                          |
| Other race         | 1.001(0.999, 1.003)        |                          |
| <b>BMI</b>         |                            | 0.105                    |
| Not overweight     | 1.001(1.000,1.003)         |                          |
| Overweight         | 0.997(0.993, 1.001)        |                          |
| Obesity            | <b>1.002(1.000,1.003)</b>  |                          |

The bold values refer to  $p < 0.05$ . Adjusted for sex, age, race, education level, PIR, BMI, physical activities, smoking, alcohol drinking, diabetes, hypertension, NSAIDs use, glucocorticoids use, tramadol use, vitamin D intake, vitamin K intake, dietary fiber intake. BMI: body mass index. CI: confidence intervals. EGCG: epigallocatechin-3-gallate. NSAIDs: non-steroidal anti-inflammatory drugs. OA: osteoarthritis. OR: odds ratio. PIR: poverty income ratio. Q1: 40-50. Q2: 50-60. Q3: 60-70. Q4: 70-80.

**TABLE S4** Subgroup analyses of the association between ECG and OA were stratified by sex, age, race, BMI.

| <b>Character</b>   | <b>OR(95%CI)</b>           | <b>P for interaction</b> |
|--------------------|----------------------------|--------------------------|
| <b>Sex</b>         |                            | 0.214                    |
| Female             | <b>1.005(1.000,1.010)</b>  |                          |
| Male               | 1.001(0.994, 1.007)        |                          |
| <b>Age</b>         |                            | 0.224                    |
| Q1                 | <b>1.006(1.002, 1.009)</b> |                          |
| Q2                 | 1.000(0.992, 1.008)        |                          |
| Q3                 | <b>1.005(1.000, 1.009)</b> |                          |
| Q4                 | 0.996(0.986,1.006)         |                          |
| <b>Race</b>        |                            | 0.269                    |
| Non-Hispanic white | 1.004(1.000, 1.009)        |                          |
| Non-Hispanic black | 1.004(0.986,1.023)         |                          |
| Mexican American   | <b>1.012(1.001, 1.023)</b> |                          |
| Other Hispanic     | 0.974(0.934, 1.015)        |                          |
| Other race         | 1.003(0.996, 1.011)        |                          |
| <b>BMI</b>         |                            | 0.101                    |
| Not overweight     | 1.004(0.997,1.010)         |                          |
| Overweight         | 0.993(0.983, 1.003)        |                          |
| Obesity            | <b>1.005(1.002,1.009)</b>  |                          |

The bold values refer to  $p < 0.05$ . Adjusted for sex, age, race, education level, PIR, BMI, physical activities, smoking, alcohol drinking, diabetes, hypertension, NSAIDs use, glucocorticoids use, tramadol use, vitamin D intake, vitamin K intake, dietary fiber intake. BMI: body mass index. CI: confidence intervals. ECG: epicatechin-3-gallate. NSAIDs: non-steroidal anti-inflammatory drugs. OA: osteoarthritis. OR: odds ratio. PIR: poverty income ratio. Q1: 40-50. Q2: 50-60. Q3: 60-70. Q4: 70-80.

**TABLE S5** Subgroup analyses of the association between GC and OA were stratified by sex, age, race, BMI.

| <b>Character</b>   | <b>OR(95%CI)</b>           | <b>P for interaction</b> |
|--------------------|----------------------------|--------------------------|
| <b>Sex</b>         |                            | 0.265                    |
| Female             | 1.025(0.982,1.070)         |                          |
| Male               | 0.995(0.950, 1.042)        |                          |
| <b>Age</b>         |                            | 0.310                    |
| Q1                 | 1.028(0.974, 1.084)        |                          |
| Q2                 | 0.975(0.924, 1.029)        |                          |
| Q3                 | 1.031(0.984, 1.080)        |                          |
| Q4                 | 0.977(0.908,1.051)         |                          |
| <b>Race</b>        |                            | 0.371                    |
| Non-Hispanic white | 1.015(0.973, 1.058)        |                          |
| Non-Hispanic black | 1.020(0.901,1.154)         |                          |
| Mexican American   | <b>1.083(1.008, 1.164)</b> |                          |
| Other Hispanic     | 0.814(0.581, 1.139)        |                          |
| Other race         | 1.025(0.961, 1.092)        |                          |
| <b>BMI</b>         |                            | 0.082                    |
| Not overweight     | 1.004(0.943,1.070)         |                          |
| Overweight         | 0.959(0.905, 1.016)        |                          |
| Obesity            | 1.031(0.996,1.067)         |                          |

The bold values refer to  $p < 0.05$ . Adjusted for sex, age, race, education level, PIR, BMI, physical activities, smoking, alcohol drinking, diabetes, hypertension, NSAIDs use, glucocorticoids use, tramadol use, vitamin D intake, vitamin K intake, dietary fiber intake. BMI: body mass index. CI: confidence intervals. GC: gallic acid. NSAIDs: non-steroidal anti-inflammatory drugs. OA: osteoarthritis. OR: odds ratio. PIR: poverty income ratio. Q1: 40-50. Q2: 50-60. Q3: 60-70. Q4: 70-80.

**TABLE S6** Subgroup analyses of the association between EC and OA were stratified by sex, age, race, BMI.

| <b>Character</b>   | <b>OR(95%CI)</b>           | <b>P for interaction</b> |
|--------------------|----------------------------|--------------------------|
| <b>Sex</b>         |                            | 0.201                    |
| Female             | <b>1.012(1.002,1.022)</b>  |                          |
| Male               | 0.998(0.982, 1.015)        |                          |
| <b>Age</b>         |                            | 0.244                    |
| Q1                 | <b>1.011(1.001, 1.021)</b> |                          |
| Q2                 | 1.004(0.991, 1.017)        |                          |
| Q3                 | <b>1.012(1.001, 1.022)</b> |                          |
| Q4                 | 0.996(0.980,1.013)         |                          |
| <b>Race</b>        |                            | 0.365                    |
| Non-Hispanic white | <b>1.010(1.000, 1.019)</b> |                          |
| Non-Hispanic black | 1.004(0.969,1.039)         |                          |
| Mexican American   | 1.020(0.996, 1.045)        |                          |
| Other Hispanic     | 1.004(0.969, 1.040)        |                          |
| Other race         | 1.007(0.993, 1.020)        |                          |
| <b>BMI</b>         |                            | 0.803                    |
| Not overweight     | 1.009(0.996,1.021)         |                          |
| Overweight         | 0.999(0.982, 1.016)        |                          |
| Obesity            | 1.009(1.000,1.018)         |                          |

The bold values refer to  $p < 0.05$ . Adjusted for sex, age, race, education level, PIR, BMI, physical activities, smoking, alcohol drinking, diabetes, hypertension, NSAIDs use, glucocorticoids use, tramadol use, vitamin D intake, vitamin K intake, dietary fiber intake. BMI: body mass index. CI: confidence intervals. EC: epicatechin. NSAIDs: non-steroidal anti-inflammatory drugs. OA: osteoarthritis. OR: odds ratio. PIR: poverty income ratio. Q1: 40-50. Q2: 50-60. Q3: 60-70. Q4: 70-80.
